# Supplementary material for: Short-term association between ambient temperature and homicide in South Africa: a case-crossover study
Source: PubMed Central journal article supplement (PMC6915878; doi:10.1186/s12940-019-0549-4), 2019-12-16
Supplement: 12940_2019_549_MOESM1_ESM.pdf [file 12940_2019_549_MOESM1_ESM.pdf]

## Supplementary Material

### **Short-term association between ambient temperature and homicide in South Africa: a case-crossover study**

Abigail Gates, Mitchel Klein, Fiorella Acquaotta, Rebecca M Garland, Noah Scovronick

#### **Figures**

- Figure S1** Provincial and district boundaries of South Africa, location of monitoring temperature stations and source of data ..... 1
- Figure S2** Number of districts with temperature data over the study period ..... 2

#### **Tables**

- Table S1** Associations between same-day maximum temperature and homicide by district, tests for interaction and heterogeneity, and overall country-level association estimated by random-effects meta-analysis. .... 3
- Table S2** Association between same-day maximum temperature and homicide by province..... 5
- Table S3** Sensitivity analyses ..... 6
- Table S4** Association by age and sex between daily mean temperature and homicide ..... 7
- Table S5** Association by age and sex between daily minimum temperature and homicide ..... 8

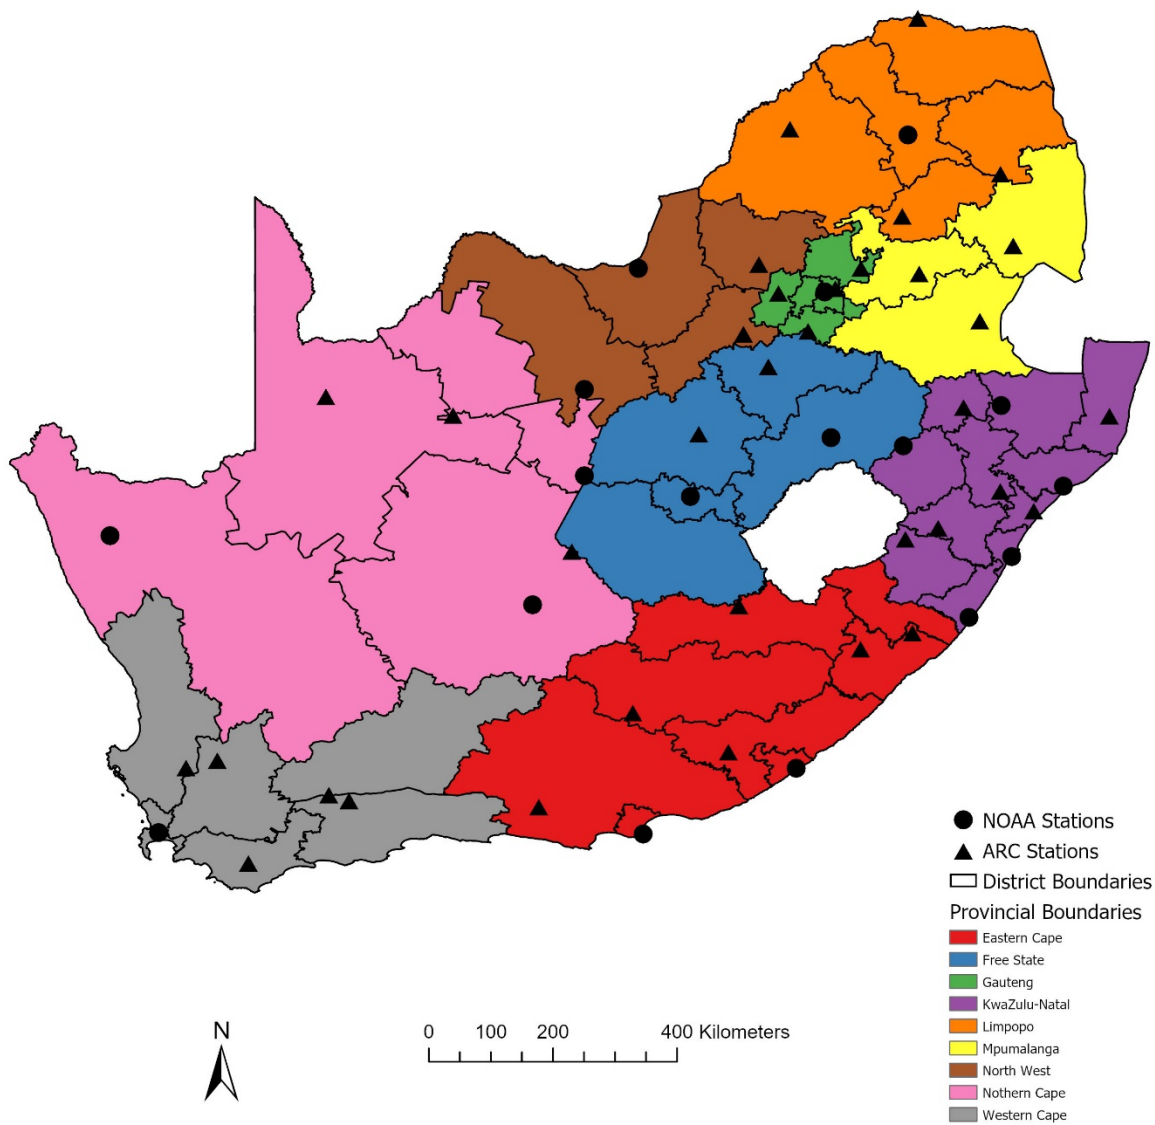

**Figure S1. Provincial and district boundaries of South Africa, location of the temperature monitoring stations, and source of the data.** ARC = Agricultural Research Council (South Africa), NOAA = National Oceanographic and Atmospheric Administration (USA). District boundaries are for 2011.

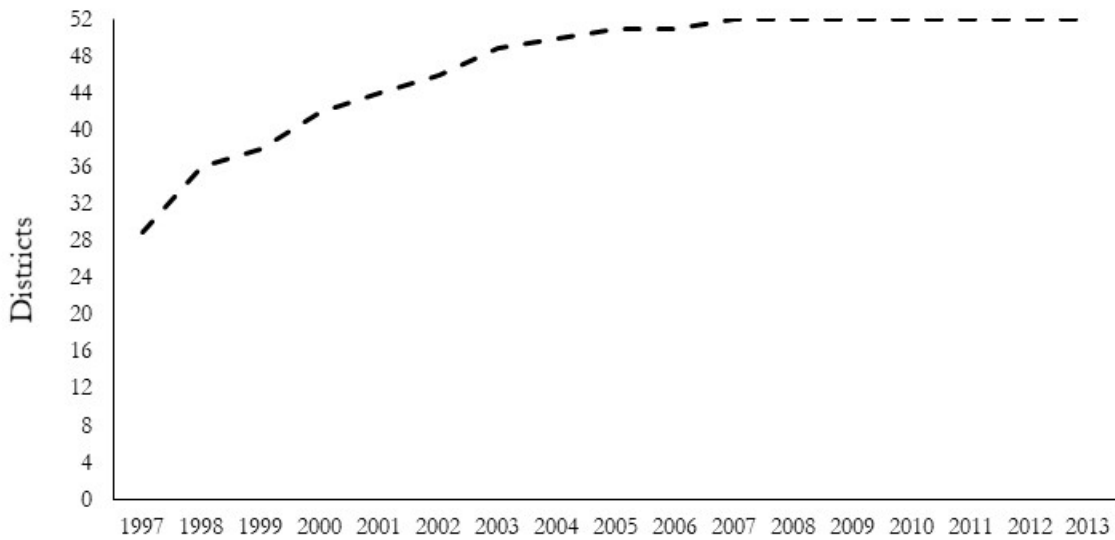

**Figure S2.** Number of districts (n=52) with temperature data over the study period.

**Table S1**

Associations between same-day maximum temperature and homicide by district, tests for interaction and heterogeneity, and overall country-level association estimated by random-effects meta-analysis. Odds ratios are reported per °C increase in temperature. Numbers in parentheses are 95% confidence intervals.

| <b>District</b>      | <b>Province<sup>a</sup></b> | <b>Definite homicides<sup>b</sup></b> | <b>Total homicides<sup>c</sup></b> |
|----------------------|-----------------------------|---------------------------------------|------------------------------------|
| Alfred Nzo           | EC                          | 1.014 (1.000, 1.027)                  | 1.010 (1.000, 1.020)               |
| Amajuba              | KZN                         | 1.039 (1.011, 1.066)                  | 1.011 (0.993, 1.029)               |
| Amathole             | EC                          | 1.010 (1.001, 1.018)                  | 1.013 (1.008, 1.019)               |
| Bojanala             | NW                          | 1.021 (1.001, 1.041)                  | 1.010 (0.999, 1.022)               |
| Buffalo City         | EC                          | 0.994 (0.978, 1.009)                  | 0.995 (0.984, 1.005)               |
| Cacadu               | EC                          | 0.999 (0.986, 1.012)                  | 1.003 (0.994, 1.013)               |
| Cape Winelands       | WC                          | 1.011 (0.999, 1.023)                  | 1.017 (1.009, 1.024)               |
| Capricorn            | LIM                         | 1.010 (0.982, 1.037)                  | 1.016 (1.005, 1.027)               |
| Central Karoo        | WC                          | 1.017 (0.988, 1.046)                  | 1.006 (0.984, 1.030)               |
| Chris Hani           | EC                          | 1.019 (1.006, 1.031)                  | 1.018 (1.010, 1.027)               |
| City of Cape Town    | WC                          | 1.018 (1.011, 1.024)                  | 1.011 (1.007, 1.015)               |
| City of Johannesburg | GT                          | 1.045 (1.026, 1.064)                  | 1.012 (1.007, 1.017)               |
| City of Tshwane      | GT                          | 1.032 (1.008, 1.055)                  | 1.012 (1.003, 1.022)               |
| Dr Kenneth Kaunda    | NW                          | 1.029 (1.003, 1.055)                  | 1.027 (1.015, 1.040)               |
| Dr Ruth Segomotsi    | NW                          | 1.046 (1.002, 1.090)                  | 1.023 (1.005, 1.043)               |
| Eden                 | WC                          | 1.004 (0.991, 1.017)                  | 1.004 (0.996, 1.013)               |
| Ehlanzeni            | MP                          | 1.014 (0.993, 1.035)                  | 1.013 (1.000, 1.026)               |
| Ekurhuleni           | GT                          | 1.031 (1.014, 1.049)                  | 1.014 (1.006, 1.021)               |
| eThekweni            | KZN                         | 1.010 (0.994, 1.025)                  | 1.013 (1.007, 1.018)               |
| Fezile Dabi          | FS                          | 1.034 (1.006, 1.061)                  | 1.022 (1.001, 1.042)               |
| Frances Baard        | NC                          | 1.034 (1.012, 1.056)                  | 1.020 (1.004, 1.037)               |
| Gert Sibande         | MP                          | 1.021 (1.000, 1.041)                  | 1.010 (0.999, 1.021)               |
| Greater Sekhukhune   | LIM                         | 0.989 (0.945, 1.033)                  | 1.014 (0.995, 1.033)               |
| iLembe               | KZN                         | 1.016 (0.984, 1.048)                  | 1.020 (1.003, 1.036)               |
| Joe Gqabi            | EC                          | 1.011 (0.983, 1.039)                  | 1.010 (0.989, 1.032)               |
| John Taolo Gaetsewe  | NC                          | 0.988 (0.939, 1.037)                  | 0.986 (0.947, 1.026)               |
| Lejweleputswa        | FS                          | 1.028 (1.010, 1.047)                  | 1.009 (0.994, 1.023)               |
| Mangaung             | FS                          | 1.044 (1.026, 1.062)                  | 1.022 (1.011, 1.033)               |
| Mopani               | LIM                         | 1.025 (1.001, 1.050)                  | 1.004 (0.990, 1.018)               |
| Namakwa              | NC                          | 1.024 (0.992, 1.056)                  | 1.018 (0.993, 1.045)               |
| Nelson Mandela Bay   | EC                          | 1.017 (1.004, 1.029)                  | 1.014 (1.007, 1.021)               |
| Ngaka Modiri Molema  | NW                          | 1.009 (0.979, 1.038)                  | 1.005 (0.987, 1.023)               |
| Nkangala             | MP                          | 1.014 (0.985, 1.043)                  | 1.016 (1.000, 1.032)               |
| OR Tambo             | EC                          | 1.006 (0.996, 1.016)                  | 1.005 (1.000, 1.010)               |
| Overberg             | WC                          | 0.994 (0.960, 1.028)                  | 0.993 (0.968, 1.018)               |
| Pixley ka Seme       | NC                          | 1.022 (0.997, 1.047)                  | 1.026 (1.006, 1.047)               |
| Sedibeng             | GT                          | 1.013 (0.989, 1.037)                  | 1.018 (1.004, 1.032)               |
| Sisonke              | KZN                         | 1.016 (0.998, 1.034)                  | 1.015 (1.003, 1.027)               |
| Siyanda              | NC                          | 1.007 (0.991, 1.022)                  | 1.008 (0.994, 1.022)               |

|                    |     |                      |                      |
|--------------------|-----|----------------------|----------------------|
| Thabo Mofutsanyane | FS  | 1.017 (0.992, 1.042) | 1.015 (0.998, 1.031) |
| Ugu                | KZN | 1.012 (0.987, 1.037) | 1.021 (1.008, 1.035) |
| uMgungundlovu      | KZN | 1.010 (0.997, 1.023) | 1.014 (1.008, 1.020) |
| uMkhanyakude       | KZN | 1.016 (0.985, 1.048) | 1.014 (0.997, 1.031) |
| uMzinyathi         | KZN | 1.017 (0.997, 1.038) | 1.012 (1.003, 1.020) |
| uThukela           | KZN | 1.052 (1.017, 1.087) | 1.030 (1.013, 1.047) |
| uThungulu          | KZN | 1.014 (1.001, 1.027) | 1.013 (1.005, 1.021) |
| Vhembe             | LIM | 1.021 (0.989, 1.053) | 1.001 (0.982, 1.021) |
| Waterberg          | LIM | 0.990 (0.955, 1.025) | 1.004 (0.986, 1.024) |
| West Coast         | WC  | 1.014 (0.991, 1.037) | 1.013 (1.003, 1.023) |
| West Rand          | GT  | 1.043 (1.019, 1.067) | 1.017 (1.006, 1.029) |
| Xhariep            | FS  | 0.998 (0.971, 1.024) | 0.998 (0.982, 1.014) |
| Zululand           | KZN | 1.025 (1.001, 1.050) | 1.017 (1.002, 1.032) |

Test for interaction (Cochrane Q)

p=0.008

p=0.094

Test for heterogeneity ( $I^2$ )

35.11 (8.76, 53.85)

21.17 (0.00, 44.55)

### Meta-analysis

1.016 (1.013, 1.019)

1.012 (1.011, 1.014)

<sup>a</sup> EC = Eastern Cape, FS = Free State, GT = Gauteng, KZN = KwaZulu-Natal, LIM = Limpopo, MP = Mpumalanga, NC = Northern Cape, NW = Northwest, WC = Western Cape.

<sup>b</sup> Definite homicides, ICD-10: X85-Y09.

<sup>c</sup> Includes definite homicides and probable homicides (ICD-10: W25-W26, W32-W34, W50, Y22-Y24, Y28-Y29).

**Table S2**

Associations between same-day maximum temperature and homicide by province. Odds ratios are reported per °C increase in temperature. Numbers in parentheses are 95% confidence intervals.

| <b>District</b> | <b>Definite homicides<sup>a</sup></b> | <b>Total homicides<sup>b</sup></b> |
|-----------------|---------------------------------------|------------------------------------|
| Eastern Cape    | 1.009 (1.005, 1.013)                  | 1.009 (1.007, 1.012)               |
| Free State      | 1.028 (1.018, 1.038)                  | 1.014 (1.007, 1.021)               |
| Gauteng         | 1.034 (1.024, 1.044)                  | 1.013 (1.010, 1.017)               |
| KwaZulu-Natal   | 1.016 (1.010, 1.022)                  | 1.014 (1.011, 1.017)               |
| Limpopo         | 1.011 (0.998, 1.025)                  | 1.010 (1.003, 1.016)               |
| Mpumalanga      | 1.017 (1.004, 1.030)                  | 1.012 (1.005, 1.020)               |
| Northern Cape   | 1.017 (1.006, 1.027)                  | 1.015 (1.006, 1.023)               |
| North West      | 1.023 (1.010, 1.037)                  | 1.017 (1.010, 1.024)               |
| Western Cape    | 1.014 (1.009, 1.019)                  | 1.011 (1.008, 1.014)               |

<sup>a</sup> Definite homicides, ICD-10: X85-Y09.

<sup>b</sup> Includes definite homicides and probable homicides (ICD-10: W25-W26, W32-W34, W50, Y22-Y24, Y28-Y29).

**Table S3**

Sensitivity analyses: Associations between same day maximum temperature and total homicides. Each test is independent of the other tests. Numbers in parentheses are 95% confidence intervals.

| <b>Model</b>                        | <b>Odds ratio</b>    |
|-------------------------------------|----------------------|
| Main model <sup>a</sup>             | 1.012 (1.011, 1.013) |
| Plus PM <sub>2.5</sub> <sup>b</sup> | 1.010 (1.003, 1.017) |
| Plus ozone <sup>c</sup>             | 1.011 (1.005, 1.016) |
| Excluding holidays                  | 1.012 (1.011, 1.013) |
| Excluding 1997-2001                 | 1.012 (1.011, 1.014) |

<sup>a</sup> As in Table 2 of the main text.

<sup>b</sup> 24-hour average. Data was available for six districts.

<sup>c</sup> Maximum daily 8-hr running average. Data was available for five districts.

**Table S4**

Association by age and sex between daily mean temperature and homicide, with odds ratios reported per 1° C increase in temperature. Numbers in parentheses are 95% confidence intervals.

|                      | Deaths included       |                    | Odds ratio            |                      |
|----------------------|-----------------------|--------------------|-----------------------|----------------------|
|                      | Definite <sup>b</sup> | Total <sup>c</sup> | Definite <sup>b</sup> | Total <sup>c</sup>   |
| Male                 |                       |                    |                       |                      |
| Lag 0 <sup>d</sup>   | 53,625                | 186,282            | 1.021 (1.018, 1.025)  | 1.018 (1.016, 1.020) |
| Lag 1 <sup>e</sup>   | 53,682                | 186,400            | 1.015 (1.012, 1.019)  | 1.012 (1.009, 1.014) |
| Lag 0-1 <sup>f</sup> | 53,277                | 184,922            | 1.023 (1.019, 1.027)  | 1.018 (1.016, 1.021) |
| Female               |                       |                    |                       |                      |
| Lag 0 <sup>d</sup>   | 8,719                 | 33,641             | 1.016 (1.007, 1.025)  | 1.012 (1.007, 1.017) |
| Lag 1 <sup>e</sup>   | 8,722                 | 33,678             | 1.016 (1.007, 1.025)  | 1.009 (1.005, 1.014) |
| Lag 0-1 <sup>f</sup> | 8,668                 | 33,396             | 1.020 (1.010, 1.030)  | 1.014 (1.008, 1.019) |
| 0-17 years           |                       |                    |                       |                      |
| Lag 0 <sup>d</sup>   | 4,067                 | 14,150             | 1.014 (1.000, 1.027)  | 1.011 (1.004, 1.019) |
| Lag 1 <sup>e</sup>   | 4,071                 | 14,170             | 1.016 (1.003, 1.030)  | 1.011 (1.003, 1.018) |
| Lag 0-1 <sup>f</sup> | 4,039                 | 14,051             | 1.019 (1.004, 1.034)  | 1.013 (1.005, 1.022) |
| 18-44 years          |                       |                    |                       |                      |
| Lag 0 <sup>d</sup>   | 47,617                | 160,465            | 1.020 (1.016, 1.024)  | 1.018 (1.016, 1.020) |
| Lag 1 <sup>e</sup>   | 47,657                | 160,548            | 1.014 (1.010, 1.018)  | 1.011 (1.009, 1.013) |
| Lag 0-1 <sup>f</sup> | 47,308                | 159,271            | 1.021 (1.017, 1.026)  | 1.018 (1.015, 1.020) |
| 45+ years            |                       |                    |                       |                      |
| Lag 0 <sup>d</sup>   | 10,313                | 44,228             | 1.026 (1.018, 1.034)  | 1.015 (1.011, 1.019) |
| Lag 1 <sup>e</sup>   | 10,332                | 44,278             | 1.023 (1.015, 1.032)  | 1.013 (1.009, 1.017) |
| Lag 0-1 <sup>f</sup> | 10,254                | 43,924             | 1.031 (1.021, 1.040)  | 1.018 (1.013, 1.022) |

a Here the mean is defined as the average between the maximum and the minimum.

b Definite homicides, ICD-10: X85-Y09.

c Includes definite homicides and probable homicides (ICD-10: W25-W26, W32-W34, W50, Y22-Y24, Y28-Y29).

d Same day's temperature.

e Previous day's temperature.

f Moving average of same and previous day's temperature.



**Table S5**

Association by age and sex between daily minimum temperature and homicide, with odds ratios reported per 1° C increase in temperature. Numbers in parentheses are 95% confidence intervals.

|                      | Deaths included       |                    | Odds ratio            |                      |
|----------------------|-----------------------|--------------------|-----------------------|----------------------|
|                      | Definite <sup>a</sup> | Total <sup>b</sup> | Definite <sup>a</sup> | Total <sup>b</sup>   |
| Male                 |                       |                    |                       |                      |
| Lag 0 <sup>c</sup>   | 53,827                | 187,001            | 1.010 (1.007, 1.014)  | 1.010 (1.008, 1.011) |
| Lag 1 <sup>d</sup>   | 53,877                | 187,129            | 1.007 (1.004, 1.010)  | 1.006 (1.004, 1.008) |
| Lag 0-1 <sup>e</sup> | 53,532                | 185,822            | 1.012 (1.008, 1.015)  | 1.010 (1.008, 1.012) |
| Female               |                       |                    |                       |                      |
| Lag 0 <sup>c</sup>   | 8,763                 | 33,786             | 1.008 (0.999, 1.016)  | 1.005 (1.001, 1.010) |
| Lag 1 <sup>d</sup>   | 8,755                 | 33,814             | 1.006 (0.998, 1.015)  | 1.004 (0.999, 1.008) |
| Lag 0-1 <sup>e</sup> | 8,712                 | 33,570             | 1.009 (1.000, 1.019)  | 1.006 (1.000, 1.011) |
| 0-17 years           |                       |                    |                       |                      |
| Lag 0 <sup>c</sup>   | 4,082                 | 14,206             | 0.999 (0.997, 1.011)  | 1.002 (0.995, 1.009) |
| Lag 1 <sup>d</sup>   | 4,088                 | 14,225             | 1.005 (0.993, 1.017)  | 1.002 (0.995, 1.008) |
| Lag 0-1 <sup>e</sup> | 4,058                 | 14,116             | 1.003 (0.989, 1.017)  | 1.002 (0.995, 1.010) |
| 18-44 years          |                       |                    |                       |                      |
| Lag 0 <sup>c</sup>   | 47,801                | 161,106            | 1.009 (1.006, 1.013)  | 1.010 (1.008, 1.012) |
| Lag 1 <sup>d</sup>   | 47,825                | 161,189            | 1.006 (1.003, 1.010)  | 1.006 (1.004, 1.008) |
| Lag 0-1 <sup>e</sup> | 47,532                | 160,080            | 1.010 (1.006, 1.015)  | 1.010 (1.008, 1.013) |
| 45+ years            |                       |                    |                       |                      |
| Lag 0 <sup>c</sup>   | 10,363                | 44,399             | 1.018 (1.010, 1.025)  | 1.007 (1.004, 1.011) |
| Lag 1 <sup>d</sup>   | 10,374                | 44,449             | 1.013 (1.005, 1.020)  | 1.006 (1.002, 1.010) |
| Lag 0-1 <sup>e</sup> | 10,311                | 44,128             | 1.020 (1.011, 1.029)  | 1.009 (1.005, 1.014) |

<sup>a</sup> Definite homicides, ICD-10: X85-Y09.

<sup>b</sup> Includes definite homicides and probable homicides (ICD-10: W25-W26, W32-W34, W50, Y22-Y24, Y28-Y29).

<sup>c</sup> Same day's temperature.

<sup>d</sup> Previous day's temperature.

<sup>e</sup> Moving average of same and previous day's temperature.
